# Association between Blood Pressure and Serum Thyroid-Stimulating Hormone Concentration within the Reference Range: A Population-Based Study

Bjørn O. Åsvold, Trine Bjørø, Tom I. L. Nilsen, and Lars J. Vatten

Department of Public Health (B.O. Å., T.I.L.N., L.J.V.), Faculty of Medicine, Norwegian University of Science and Technology, N-7489 Trondheim, Norway; St. Olavs Hospital, Trondheim University Hospital (B.O.Å.), N-7006 Trondheim, Norway; Department of Medical Biochemistry (T.B.), Rikshospitalet-Radiumhospitalet Medical Center, N-0310 Oslo, Norway

**Context:** The association between thyroid function and blood pressure is insufficiently studied.

**Objective:** The objective of the investigation was to study the association between TSH within the reference range and blood pressure.

**Design and Setting:** This was a cross-sectional, population-based study.

**Subjects:** A total of 30,728 individuals without previously known thyroid disease were studied.

**Main Outcome Measures:** The main outcome measures were mean systolic and diastolic blood pressure and pulse pressure and odds ratio for hypertension (>140/90 mm Hg or current or previous use of antihypertensive medication), according to categories of TSH.

**Results:** Within the reference range of TSH (0.50–3.5 mU/liter), there was a linear increase in blood pressure with increasing TSH. The average increase in systolic blood pressure was 2.0 mm Hg [95% confidence interval (CI) 1.4–2.6 mm Hg] per milliunit per liter increase in TSH among men, and 1.8 mm Hg (95% CI 1.4–2.3 mm Hg) in women. The corresponding increase in diastolic blood pressure was 1.6 mm Hg (95% CI 1.2–2.0 mm Hg) in men and 1.1 mm Hg (95% CI 0.8–1.3 mm Hg) in women. Comparing TSH of 3.0–3.5 mU/liter (upper part of the reference) with TSH of 0.50–0.99 mU/liter (lower part of the reference), the odds ratio for hypertension was 1.98 (95% CI 1.56–2.53) in men and 1.23 (95% CI 1.04–1.46) in women.

**Conclusion:** Within the reference range of TSH, we found a linear positive association between TSH and systolic and diastolic blood pressure that may have long-term implications for cardiovascular health. (*J Clin Endocrinol Metab* 92: 841–845, 2007)

THYROID HORMONES INFLUENCE the cardiovascular system (1), and thyroid dysfunction may increase the risk of cardiovascular disease (2). Previous studies have shown that both hypo- and hyperthyroid disease may increase the risk of hypertension (2–5) and that hypertension related to hypothyroidism may be reversed after T<sub>4</sub> treatment (6–8). Subclinical hypothyroid function, characterized by thyroid hormones within the reference range combined with elevated TSH, has been associated with higher diastolic blood pressure (9), and after T<sub>4</sub> treatment, it has been demonstrated that diastolic (10) and mean arterial pressure (11) may be reduced. However, others have failed to demonstrate any association between blood pressure and subclinical hypo- (12) or hyperthyroidism (13).

In people with no apparent thyroid dysfunction, one study showed lower thyroid function among people with hypertension (14). Consistent with this finding, the results of two recent population-based studies (13, 15) indicate a positive association between TSH within the reference range and systolic and diastolic blood pressure.

The association between TSH within the reference range and blood pressure is insufficiently studied. In a study of more than 30,000 individuals, we therefore examined

whether concentrations of TSH within the reference range are related to systolic and diastolic blood pressure, pulse pressure, and the prevalence of hypertension.

## Subjects and Methods

Between 1995 and 1997, all inhabitants 20 yr of age or older in Nord-Trøndelag County in Norway were invited to participate in the Nord-Trøndelag Health Study (HUNT). A total of 92,936 individuals were eligible to participate, and 66,140 (71.2%) attended. The study has been described in detail elsewhere (16). Briefly, the participants were asked to complete a self-administered questionnaire, which included eight thyroid-specific questions (17). By self-report, information on health and lifestyle factors was also collected as well as history of diabetes mellitus, angina pectoris, myocardial infarction, and stroke and information on the use of antihypertensive medication.

Blood pressure was measured by specially trained nurses or technicians using a Dinamap 845XT (Critikon, Tampa, FL) based on oscillometry. Cuff size was adjusted after measuring the arm circumference. After 2 min rest, the blood pressure was automatically measured three times at 1-min intervals. In this study, we used the mean value of the second and third measurement of systolic and diastolic blood pressure. Pulse pressure was calculated as the difference between systolic and diastolic blood pressure.

A nonfasting venous blood sample was drawn from each individual. Analysis of serum TSH was carried out in subsamples of the population, including all women older than 40 yr of age and 50% of men older than 40 yr of age. In addition, TSH was measured in 5% random samples of men and women 20–40 yr of age. In total, 34,851 individuals from these samples were selected for TSH analysis.

Nord-Trøndelag County is located in the middle part of Norway and is characterized by a stable and homogenous population (16). The prevalence of thyroid disease has been previously estimated (17). Briefly, 0.6% of men and 2.5% of women had hyperthyroidism, whereas 0.9% of

First Published Online January 2, 2007

Abbreviations: BMI, Body mass index; CI, confidence interval.

JCEM is published monthly by The Endocrine Society (<http://www.endo-society.org>), the foremost professional society serving the endocrine community.

men and 4.8% of women had hypothyroidism, based on self-report. Among people older than 40 yr of age, 19.6% reported current or previous use of antihypertensive medication. The Norwegian population is generally considered to have sufficient iodine intake (18).

### Laboratory measurements

Serum concentration of TSH was analyzed at the Hormone Laboratory, Aker University Hospital, Oslo, using DELFIA hTSH Ultra (sensitivity 0.03 mU/liter and total analytical variation < 5%; Wallac Oy, Turku, Finland). Reference ranges for TSH from this population have been published previously (17). Based on these results, the reference range for TSH in the present study was defined as 0.50–3.5 mU/liter.

### Statistical analyses

Among the 34,851 individuals who were selected for TSH analysis, 30,728 were included in the present study. Exclusion criteria were previously known thyroid disease ( $n = 2904$ ) and missing information on TSH, blood pressure, use of antihypertensive medication, or smoking status ( $n = 1219$ ). In the analyses related to systolic and diastolic blood pressure and pulse pressure, we further excluded those who reported current or previous use of antihypertensive medication ( $n = 5702$ ).

The association between TSH and blood pressure was analyzed using general linear models. Within the reference range of TSH, we calculated mean systolic and diastolic blood pressure and pulse pressure for six categories of TSH (0.50–0.99, 1.00–1.4, 1.5–1.9, 2.0–2.4, 2.5–2.9, and 3.0–3.5 mU/liter). We also analyzed the association between TSH and blood pressure by calculating partial-regression coefficients, with corresponding 95% confidence intervals (CI). The partial-regression coefficients are presented as the average increase in blood pressure per milliunit per liter increase in TSH. Results from the analyses of log-transformed and nontransformed blood pressure were nearly identical, and we therefore present the nontransformed results.

We stratified the association of TSH and blood pressure by sex and age (age groups younger than 50 yr of age, 50–69 yr, and 70 yr and older). Similarly, we assessed whether the association of TSH and blood pressure differed between current smokers, former smokers, and never-smokers and between overweight and normal weight individuals, using body mass index (BMI; weight divided by the squared value of height) of 25.0 kg/m<sup>2</sup> as cutoff.

In a logistic regression model, we calculated odds ratios for hypertension for the six categories of TSH within the reference range, using TSH 0.50–0.99 mU/liter as reference group. Hypertension was defined as systolic blood pressure higher than 140 mm Hg and/or diastolic blood pressure higher than 90 mm Hg and/or current or previous use of antihypertensive medication.

In a separate analysis, we studied the association with blood pressure also including TSH concentrations outside the reference range. We calculated mean systolic and diastolic blood pressure and pulse pressure for five categories of TSH [less than 0.10, 0.10–0.49, 0.50–3.5 (reference range), 3.6–9.9, and 10.0 mU/liter and higher]. We compared the blood pressures for each category of TSH outside the reference range with mean blood pressures corresponding to TSH within the reference range. In a logistic regression model, we calculated odds ratios for hypertension for these categories of TSH, using TSH 0.50–3.5 mU/liter as reference group.

The data were analyzed using the Statistical Package for the Social Sciences (SPSS), version 14.0 for Windows (SPSS Inc., Chicago, IL).

The HUNT study is a collaborative effort of the Faculty of Medicine, the Norwegian University of Science and Technology, the Norwegian Institute of Public Health, and Nord-Trøndelag County Council. The study was approved by the regional committee for medical research ethics and by the Norwegian Data Inspectorate.

## Results

Within the reference range of TSH (0.50–3.5 mU/liter), there was a linear increase in systolic and diastolic blood pressure with increasing concentration of TSH (Figs. 1 and 2). The average increase in systolic blood pressure per milliunit per liter increase in TSH was 2.0 mm Hg (95% CI

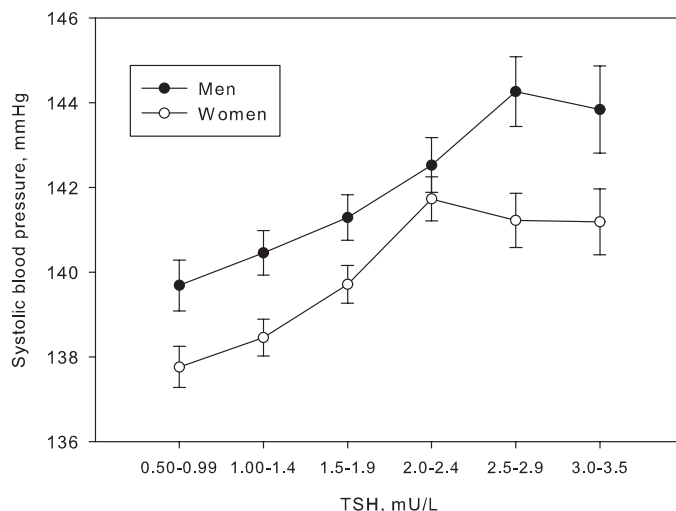

FIG. 1. Mean systolic blood pressure (with SE) by categories of TSH within the reference range (0.50–3.5 mU/liter) in men ( $n = 8,014$ ) and women ( $n = 14,721$ ), adjusted for age and smoking status.

1.4–2.6 mm Hg) in men and 1.8 mm Hg (95% CI 1.4–2.3 mm Hg) in women. Similarly, the average increase in diastolic blood pressure per milliunit per liter increase in TSH was 1.6 mm Hg (95% CI 1.2–2.0 mm Hg) in men and 1.1 mm Hg (95% CI 0.8–1.3 mm Hg) in women. In women, the average increase in pulse pressure was 0.8 mm Hg (95% CI, 0.5–1.1 mm Hg) per milliunit per liter increase in TSH, but in men, TSH was not significantly associated with pulse pressure. These results were adjusted for age and smoking status. Additional adjustment for arm circumference and the prevalence of diabetes mellitus, angina pectoris, myocardial infarction, or stroke did not substantially influence the results.

Subgroup analyses showed that the association between TSH and systolic and diastolic blood pressure was consistent in all age groups, except for systolic blood pressure in men above 70 yr of age. There was a statistically significant increase in pulse pressure with increasing TSH in men 50–69

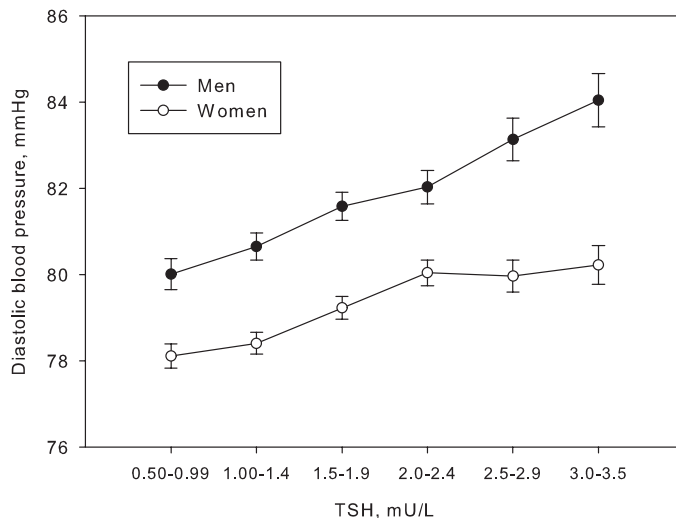

FIG. 2. Mean diastolic blood pressure (with SE) by categories of TSH within the reference range (0.50–3.5 mU/liter) in men ( $n = 8,014$ ) and women ( $n = 14,721$ ), adjusted for age and smoking status.

**TABLE 1.** Mean increase (mm Hg, with 95% CI) in systolic (SBP) and diastolic blood pressure (DBP) and pulse pressure (PP) per milliunit per liter increase in TSH within the reference range (TSH of 0.50–3.5 mU/liter) in men and women, by categories of age, smoking, and BMI, adjusted for age and smoking status

|                         | Men  |                      |                  |                       | Women |                  |                  |                      |
|-------------------------|------|----------------------|------------------|-----------------------|-------|------------------|------------------|----------------------|
|                         | No.  | SBP                  | DBP              | PP                    | No.   | SBP              | DBP              | PP                   |
| Age                     |      |                      |                  |                       |       |                  |                  |                      |
| <50 yr                  | 2971 | 1.6<br>(0.8–2.4)     | 1.4<br>(0.8–1.9) | 0.3<br>(–0.3 to 0.8)  | 5576  | 1.6<br>(1.0–2.2) | 1.1<br>(0.7–1.5) | 0.5<br>(0.1–1.0)     |
| 50–69 yr                | 3601 | 2.9<br>(1.9–3.8)     | 1.8<br>(1.3–2.4) | 1.1<br>(0.4–1.7)      | 6447  | 2.2<br>(1.4–2.9) | 1.1<br>(0.7–1.6) | 1.1<br>(0.5–1.6)     |
| ≥70 yr                  | 1442 | 0.8<br>(–0.9 to 2.4) | 1.6<br>(0.7–2.4) | –0.8<br>(–2.0 to 0.4) | 2698  | 1.5<br>(0.2–2.8) | 0.9<br>(0.1–1.6) | 0.6<br>(–0.3 to 1.6) |
| Smoking                 |      |                      |                  |                       |       |                  |                  |                      |
| Never                   | 2628 | 2.0<br>(1.0–3.0)     | 1.8<br>(1.2–2.5) | 0.2<br>(–0.5 to 0.9)  | 7037  | 1.9<br>(1.2–2.6) | 1.1<br>(0.7–1.5) | 0.8<br>(0.3–1.3)     |
| Former                  | 2882 | 1.6<br>(0.5–2.6)     | 1.1<br>(0.5–1.7) | 0.5<br>(–0.3 to 1.2)  | 3141  | 2.3<br>(1.4–3.3) | 1.1<br>(0.5–1.6) | 1.3<br>(0.6–1.9)     |
| Current                 | 2504 | 2.5<br>(1.4–3.7)     | 2.1<br>(1.4–2.8) | 0.5<br>(–0.3 to 1.3)  | 4543  | 1.4<br>(0.5–2.2) | 1.0<br>(0.5–1.5) | 0.4<br>(–0.2 to 1.0) |
| BMI                     |      |                      |                  |                       |       |                  |                  |                      |
| <25.0 kg/m <sup>2</sup> | 2649 | 2.0<br>(0.9–3.1)     | 1.6<br>(1.0–2.2) | 0.4<br>(–0.4 to 1.1)  | 6200  | 1.0<br>(0.4–1.7) | 0.7<br>(0.3–1.1) | 0.4<br>(–0.1 to 0.8) |
| ≥25.0 kg/m <sup>2</sup> | 5324 | 1.9<br>(1.1–2.6)     | 1.5<br>(1.0–1.9) | 0.4<br>(–0.1 to 0.9)  | 8401  | 2.0<br>(1.4–2.6) | 1.1<br>(0.7–1.5) | 0.9<br>(0.5–1.4)     |

yr of age and in women younger than 70 yr of age. The positive association between TSH and systolic and diastolic blood pressure was present in former and current smokers as well as never-smokers and in overweight as well as normal weight people (Table 1).

In both sexes, the prevalence of hypertension increased with increasing TSH within the reference range, but the association was stronger in men than in women (Table 2). Comparing TSH of 3.0–3.5 mU/liter (upper part of the reference) with TSH of 0.50–0.99 mU/liter (lower part of the reference), the odds ratio for hypertension was 1.98 (95% CI 1.56–2.53) in men and 1.23 (95% CI 1.04–1.46) in women.

In a separate analysis, including the entire range of TSH, systolic and diastolic blood pressure and pulse pressure increased with increasing TSH in women, except for women

**TABLE 2.** Odds ratio (OR) for hypertension (systolic blood pressure > 140 mm Hg and/or diastolic blood pressure > 90 mm Hg or current or previous use of antihypertensive medication), by categories of TSH, in men and women

| TSH (mU/liter)        | No.  | No. hypertension | OR <sup>a</sup> | 95% CI |      |
|-----------------------|------|------------------|-----------------|--------|------|
| Men                   |      |                  |                 |        |      |
| 0.50–0.90             | 1648 | 812              | 1.0 (Ref.)      |        |      |
| 1.00–1.4              | 2863 | 1548             | 1.18            | 1.04   | 1.34 |
| 1.5–1.9               | 2481 | 1412             | 1.27            | 1.11   | 1.45 |
| 2.0–2.4               | 1391 | 830              | 1.39            | 1.19   | 1.62 |
| 2.5–2.9               | 740  | 490              | 1.68            | 1.39   | 2.04 |
| 3.0–3.5               | 442  | 317              | 1.98            | 1.56   | 2.53 |
| <i>P</i> <sup>b</sup> |      |                  | <0.001          |        |      |
| Women                 |      |                  |                 |        |      |
| 0.50–0.99             | 3237 | 1490             | 1.0 (Ref.)      |        |      |
| 1.00–1.4              | 5030 | 2388             | 1.02            | 0.92   | 1.13 |
| 1.5–1.9               | 4566 | 2410             | 1.15            | 1.03   | 1.27 |
| 2.0–2.4               | 2803 | 1652             | 1.38            | 1.22   | 1.55 |
| 2.5–2.9               | 1596 | 955              | 1.29            | 1.12   | 1.48 |
| 3.0–3.5               | 989  | 589              | 1.23            | 1.04   | 1.46 |
| <i>P</i> <sup>b</sup> |      |                  | <0.001          |        |      |

Ref., Reference group.

<sup>a</sup> Adjusted for age and smoking status.

<sup>b</sup> *P* value for linear trend across the categories of TSH.

whose TSH was lower than 0.10 mU/liter. In these women, both systolic pressure and pulse pressure were higher than for women with TSH within the reference range (Table 3). The prevalence of hypertension was higher in women with TSH lower than 0.10 mU/liter (odds ratio 1.70, 95% CI 1.09–2.66) or TSH 3.6–9.9 mU/liter (odds ratio 1.20, 95% CI 1.06–1.36), compared with women with TSH within the reference range. In men with TSH outside the reference range, mean systolic and diastolic blood pressure, pulse pressure, and the prevalence of hypertension, did not clearly differ from men with TSH within the reference range (Table 4).

## Discussion

In this population study of more than 30,000 men and women, we found that both systolic and diastolic blood pressure increased linearly with increasing TSH within the reference range of 0.50–3.5 mU/liter. We also found that the prevalence of hypertension increased with increasing TSH

**TABLE 3.** Mean systolic (SBP) and diastolic (DBP) blood pressure and pulse pressure (PP) in mm Hg, by categories of TSH, in men and women

| TSH (mU/liter) | No.    | SBP <sup>a</sup> | <i>P<sup>b</sup></i> | DBP <sup>a</sup> | <i>P<sup>b</sup></i> | PP <sup>a</sup> | <i>P<sup>b</sup></i> |
|----------------|--------|------------------|----------------------|------------------|----------------------|-----------------|----------------------|
| <b>Men</b>     |        |                  |                      |                  |                      |                 |                      |
| <0.10          | 10     | 132.9            | 0.12                 | 76.3             | 0.14                 | 56.6            | 0.35                 |
| 0.10–0.49      | 137    | 140.4            | 0.42                 | 79.6             | 0.06                 | 60.8            | 0.64                 |
| 0.50–3.5       | 8,014  | 141.6            | Ref.                 | 81.3             | Ref.                 | 60.3            | Ref.                 |
| 3.6–9.9        | 406    | 143.0            | 0.13                 | 82.5             | 0.04                 | 60.6            | 0.68                 |
| ≥10.0          | 32     | 139.8            | 0.57                 | 81.3             | 0.99                 | 58.5            | 0.43                 |
| <b>Women</b>   |        |                  |                      |                  |                      |                 |                      |
| <0.10          | 88     | 144.6            | 0.01                 | 80.6             | 0.20                 | 64.0            | 0.01                 |
| 0.10–0.49      | 322    | 138.3            | 0.31                 | 77.9             | 0.07                 | 60.4            | 0.96                 |
| 0.50–3.5       | 14,721 | 139.4            | Ref.                 | 79.0             | Ref.                 | 60.4            | Ref.                 |
| 3.6–9.9        | 1,139  | 141.7            | <0.001               | 80.3             | <0.001               | 61.4            | 0.01                 |
| ≥10.0          | 157    | 144.2            | <0.01                | 81.1             | 0.02                 | 63.1            | 0.01                 |

Ref., Reference group.

<sup>a</sup> Adjusted for age and smoking status.

<sup>b</sup> *P* value for the difference from the reference group (TSH 0.50–3.5 mU/liter).



**TABLE 4.** Odds ratio (OR) for hypertension (systolic blood pressure > 140 mm Hg and/or diastolic blood pressure > 90 mm Hg or current or previous use of antihypertensive medication), by categories of TSH, in men and women

| TSH (mU/liter) | No.    | No. hypertension | OR <sup>a</sup> | 95% CI |      |
|----------------|--------|------------------|-----------------|--------|------|
| Men            |        |                  |                 |        |      |
| <0.10          | 13     | 6                | 0.40            | 0.13   | 1.23 |
| 0.10–0.49      | 162    | 81               | 0.79            | 0.57   | 1.10 |
| 0.50–3.5       | 9,565  | 5,409            | 1.0 (Ref.)      |        |      |
| 3.6–9.9        | 541    | 359              | 1.11            | 0.91   | 1.35 |
| ≥10.0          | 40     | 22               | 0.82            | 0.42   | 1.60 |
| Women          |        |                  |                 |        |      |
| <0.10          | 114    | 74               | 1.70            | 1.09   | 2.66 |
| 0.10–0.49      | 410    | 219              | 0.94            | 0.75   | 1.18 |
| 0.50–3.5       | 18,221 | 9,484            | 1.0 (Ref.)      |        |      |
| 3.6–9.9        | 1,475  | 938              | 1.20            | 1.06   | 1.36 |
| ≥10.0          | 187    | 114              | 1.11            | 0.79   | 1.56 |

Ref., Reference group.

<sup>a</sup> Adjusted for age and smoking status.

within the reference range, although more consistently in men than in women.

Underlying mechanisms that may explain these findings are not fully understood, but increased systemic vascular resistance (1, 7) and arterial stiffness (7, 10, 19, 20) may accompany low thyroid function. A study of people with apparently normal thyroid function showed that relatively low thyroid function was associated with increased renal vascular resistance and increased blood pressure (14). In another study, TSH in the upper part of the reference range was associated with arterial stiffness (19). In studies of people with overt or subclinical hypothyroidism, it has been shown that vascular resistance (7, 11) and arterial stiffness (7, 10, 20) may be reduced after T<sub>4</sub> treatment. It has also been shown that thyroid hormones may have direct vasodilatory effects on vascular muscle cells (21) and that endothelial dysfunction may be more prevalent in hypothyroid patients (22, 23) and individuals with TSH in the upper part of the reference range (22).

In a study of families with high prevalence of hypertension, concentrations of TSH tended to be in the upper part of the reference range, suggesting that certain genetic variants may both affect blood pressure regulation and serum TSH concentration (24). Our data, however, show a remarkably linear association with blood pressure across the reference range of TSH. Therefore, our results may not support the hypothesis that a positive association between TSH within the reference range and blood pressure could be due to a genetic variant that specifically affects people with TSH in the upper part of the reference range nor that it could be due to the minimal thyroid dysfunction that is likely to be more prevalent among people with TSH in the upper part of the reference range (25).

Outside the reference range of TSH, our findings among women tend to support previous reports of increased blood pressure both associated with hypo- and hyperthyroidism (3–5). It should be acknowledged that the number of participants with clearly pathological TSH was small, especially in men, leading to imprecise estimates for these groups.

Pulse pressure may be a useful marker for central artery stiffness in older people and has been used to assess cardiovascular risk (26). Within the reference range of TSH, the

positive association between TSH and pulse pressure was less pronounced and less consistent than the associations with systolic and diastolic blood pressure. The higher pulse pressure that we found among women with TSH of 10.0 mU/liter or higher is at variance with the suggestion that hypothyroidism is associated with a narrowed pulse pressure (1).

The association between TSH within the reference range and blood pressure was modest but displayed consistent and statistically significant patterns. The clinical significance of our findings is uncertain, but inaccuracies in blood pressure measurements indicate that the association between TSH and blood pressure is conservatively estimated. In the same population, we previously found linear associations between TSH within the reference range and serum lipids, in which relatively high TSH was associated with less favorable lipid concentrations (27).

In conclusion, we found a positive and linear association between TSH within the reference range and systolic and diastolic blood pressure. We also found increasing prevalence of hypertension with increasing TSH. Whether these associations are sufficiently strong to influence future risk of cardiovascular disease should be tested in prospective population-based studies.

### Acknowledgments

A special thanks to the Hormone Laboratory (Aker University Hospital, Oslo), which analyzed all thyroid function tests with financial support from Wallac Oy (Turku, Finland). B.O.Å. conceived the idea, did the analyses, and wrote the paper. T.B. was responsible for designing the original substudy of thyroid function within the HUNT study and participated in interpreting the results and writing the present paper. T.I.L.N. participated in the statistical analyses and interpretation of the results. L.J.V. participated in the analyses, interpreted the results, and wrote the paper.

Received October 10, 2006. Accepted December 26, 2006.

Address all correspondence and requests for reprints to: Bjørn Olav Åsvold, Department of Public Health, Faculty of Medicine, N-7489 Trondheim, Norway. E-mail: bjorn.o.asvold@ntnu.no.

This work was supported by the Norwegian University of Science and Technology and the Central Norway Regional Health Authority. The HUNT Research Centre provided the data.

Disclosure Statement: The authors have nothing to disclose.

### References

- Klein I, Ojamaa K 2001 Thyroid hormone and the cardiovascular system. *N Engl J Med* 344:501–509
- Cappola AR, Ladenson PW 2003 Hypothyroidism and atherosclerosis. *J Clin Endocrinol Metab* 88:2438–2444
- Fletcher AK, Weetman AP 1998 Hypertension and hypothyroidism. *J Hum Hypertens* 12:79–82
- Prisant LM, Gujral JS, Mulloy AL 2006 Hyperthyroidism: a secondary cause of isolated systolic hypertension. *J Clin Hypertens (Greenwich)* 8:596–599
- Saito I, Saruta T 1994 Hypertension in thyroid disorders. *Endocrinol Metab Clin North Am* 23:379–386
- Bing RF, Briggs RS, Burden AC, Russell GI, Swales JD, Thurston H 1980 Reversible hypertension and hypothyroidism. *Clin Endocrinol (Oxf)* 13:339–342
- Dernellis J, Panaretou M 2002 Effects of thyroid replacement therapy on arterial blood pressure in patients with hypertension and hypothyroidism. *Am Heart J* 143:718–724
- Streeten DH, Anderson Jr GH, Howland T, Chiang R, Smulyan H 1988 Effects of thyroid function on blood pressure. Recognition of hypothyroid hypertension. *Hypertension* 11:78–83
- Luboshitzky R, Aviv A, Herer P, Lavie L 2002 Risk factors for cardiovascular disease in women with subclinical hypothyroidism. *Thyroid* 12:421–425
- Owen PJ, Rajiv C, Vinereanu D, Mathew T, Fraser AG, Lazarus JH 2006

- Subclinical hypothyroidism, arterial stiffness and myocardial reserve. *J Clin Endocrinol Metab* 91:2126–2132
11. Faber J, Petersen L, Wiinberg N, Schifter S, Mehlsen J 2002 Hemodynamic changes after levothyroxine treatment in subclinical hypothyroidism. *Thyroid* 12:319–324
  12. Walsh JP, Bremner AP, Bulsara MK, O'Leary P, Leedman PJ, Feddema P, Michelangeli V 2006 Subclinical thyroid dysfunction and blood pressure: a community-based study. *Clin Endocrinol (Oxf)* 65:486–491
  13. Volzke H, Alte D, Dorr M, Wallaschofski H, John U, Felix SB, Rettig R 2006 The association between subclinical hyperthyroidism and blood pressure in a population-based study. *J Hypertens* 24:1947–1953
  14. Gumieniak O, Perlstein TS, Hopkins PN, Brown NJ, Murphey LJ, Jeunemaitre X, Hollenberg NK, Williams GH 2004 Thyroid function and blood pressure homeostasis in euthyroid subjects. *J Clin Endocrinol Metab* 89:3455–3461
  15. Iqbal A, Figenschau Y, Jorde R 2006 Blood pressure in relation to serum thyrotropin: the Tromsø study. *J Hum Hypertens* 20:932–936
  16. Holmen J, Midthjell K, Kruger O, Langhammer A, Holmen TL, Bratberg GH, Vatten LJ, Lund-Larsen PG 2003 The Nord-Trøndelag Health Study 1995–97 (HUNT 2): objectives, contents, methods and participation. *Norsk Epidemiologi* 13:19–32
  17. Bjoro T, Holmen J, Kruger O, Midthjell K, Hunstad K, Schreiner T, Sandnes L, Brochmann H 2000 Prevalence of thyroid disease, thyroid dysfunction and thyroid peroxidase antibodies in a large, unselected population. The Health Study of Nord-Trøndelag (HUNT). *Eur J Endocrinol* 143:639–647
  18. Kapelrud H, Frey H, Theodorsen L 1987 [Excretion of iodine in the urine. A study from 6 different Norwegian districts in 1985]. *Tidsskr Nor Laegeforen* 107:1320–1, 1317
  19. Dagre AG, Lekakis JP, Papaioannou TG, Papamichael CM, Koutras DA, Stamatelopoulos SF, Alevizaki M 2005 Arterial stiffness is increased in subjects with hypothyroidism. *Int J Cardiol* 103:1–6
  20. Obuobie K, Smith J, Evans LM, John R, Davies JS, Lazarus JH 2002 Increased central arterial stiffness in hypothyroidism. *J Clin Endocrinol Metab* 87:4662–4666
  21. Klein I, Ojamaa K 2001 Thyroid hormone: targeting the vascular smooth muscle cell. *Circ Res* 88:260–261
  22. Lekakis J, Papamichael C, Alevizaki M, Piperlingos G, Marafelia P, Mantzos J, Stamatelopoulos S, Koutras DA 1997 Flow-mediated, endothelium-dependent vasodilation is impaired in subjects with hypothyroidism, borderline hypothyroidism, and high-normal serum thyrotropin (TSH) values. *Thyroid* 7:411–414
  23. Taddei S, Caraccio N, Virdis A, Dardano A, Versari D, Ghiadoni L, Salvetti A, Ferrannini E, Monzani F 2003 Impaired endothelium-dependent vasodilation in subclinical hypothyroidism: beneficial effect of levothyroxine therapy. *J Clin Endocrinol Metab* 88:3731–3737
  24. Gumieniak O, Hurwitz S, Perlstein TS, Ngumezi UC, Hopkins PN, Jeunemaitre X, Williams GH 2005 Aggregation of high-normal thyroid-stimulating hormone in hypertensive families. *J Clin Endocrinol Metab* 90:5985–5990
  25. Surks MI, Goswami G, Daniels GH 2005 The thyrotropin reference range should remain unchanged. *J Clin Endocrinol Metab* 90:5489–5496
  26. Franklin SS 2004 Pulse pressure as a risk factor. *Clin Exp Hypertens* 26:645–652
  27. Åsvold BO, Vatten LJ, Nilsen TIL, Bjoro T 2007 The association between TSH within the reference range and serum lipid concentrations in a population-based study. The HUNT Study. *Eur J Endocrinol* 156:183–188

JCEM is published monthly by The Endocrine Society (<http://www.endo-society.org>), the foremost professional society serving the endocrine community.
